# Supplementary material for: An effective strategy to synthesize a novel biodegradable isosorbide-based polycarbonate
Source: Royal Society of Chemistry journal article supplement (doi:10.1039/d5py01100k), 2026-01-01
Supplement: d5py01100k1.pdf [file d5py01100k1.pdf]

## **Supporting Information**

This document contains supplement figures and tables referenced in the manuscript.

Contents:

- S1. Comparison of PC structures
- S2. Green Metrics Calculation Details
- S3. NMR Spectra

## S1. Comparison of PC structures

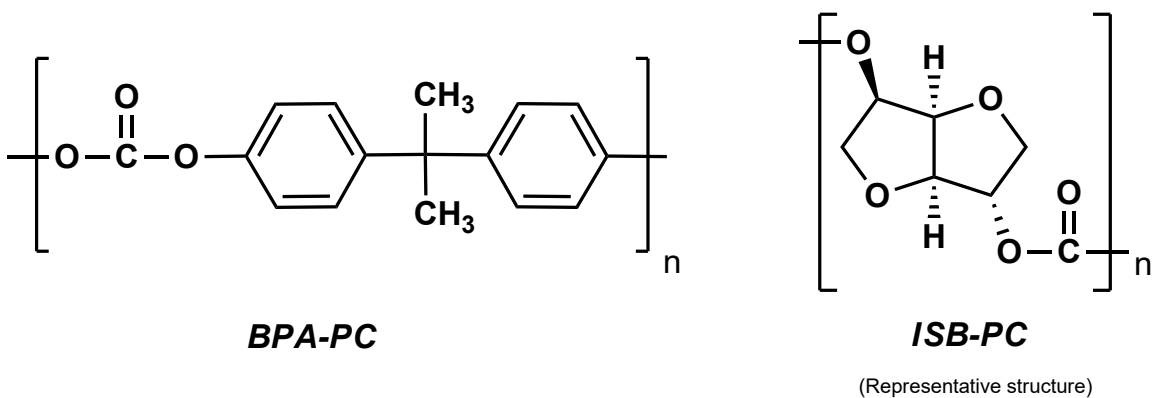

**Figure S1.** Chemical structures of the commercial polycarbonates used for comparison: (left) petrochemical-based polycarbonate (BPA-PC) and (right) representative bio-based polycarbonate (ISB-PC). The ISB-PC structure is shown as a representative repeat unit because the exact comonomer composition of the commercial grade is proprietary.

## S2. Green Metrics Calculation for Solvent-Free Synthesis of ISB-Based Polycarbonate

Detailed green chemistry metrics (E-factor, PMI, Atom Economy) based on experimental values and theoretical analysis.

To evaluate the environmental efficiency of the solvent-free melt polycondensation process used to synthesize EO-functionalized isosorbide-based polycarbonate (ISB-PC), standard green chemistry metrics were calculated using the following formulas:

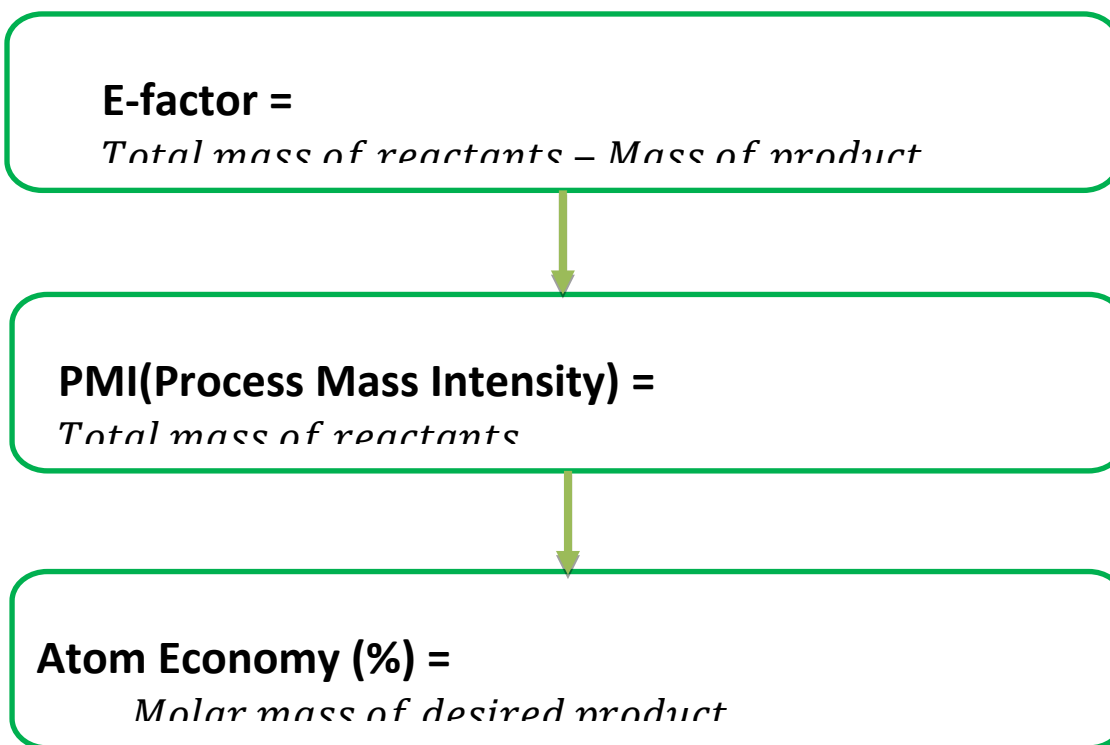

**Figure S2.** Calculation workflow for green metrics.

The calculation was based on the following experimental data:

| Parameter                                     | Value      |
|-----------------------------------------------|------------|
| Total mass of reactants                       | 567.96 g   |
| Mass of product (ISB-PC)                      | 286.79 g   |
| Estimated molar mass of ISB-PC repeating unit | ~364 g/mol |

|                |                      |
|----------------|----------------------|
| Main byproduct | Phenol (94.11 g/mol) |
|----------------|----------------------|

Results of the calculations:

- E-factor =  $(567.96 - 286.79) / 286.79 = 0.98$
- PMI =  $567.96 / 286.79 = 1.98$
- Atom Economy =  $286.79 / (286.79 + \text{approx. } 281.38 \text{ phenol}) \times 100 \approx 50.5\%$

These values indicate that the synthetic process is resource-efficient, produces minimal waste, and aligns with green chemistry principles, with phenol as the only stoichiometric byproduct.

### S3. NMR Spectra

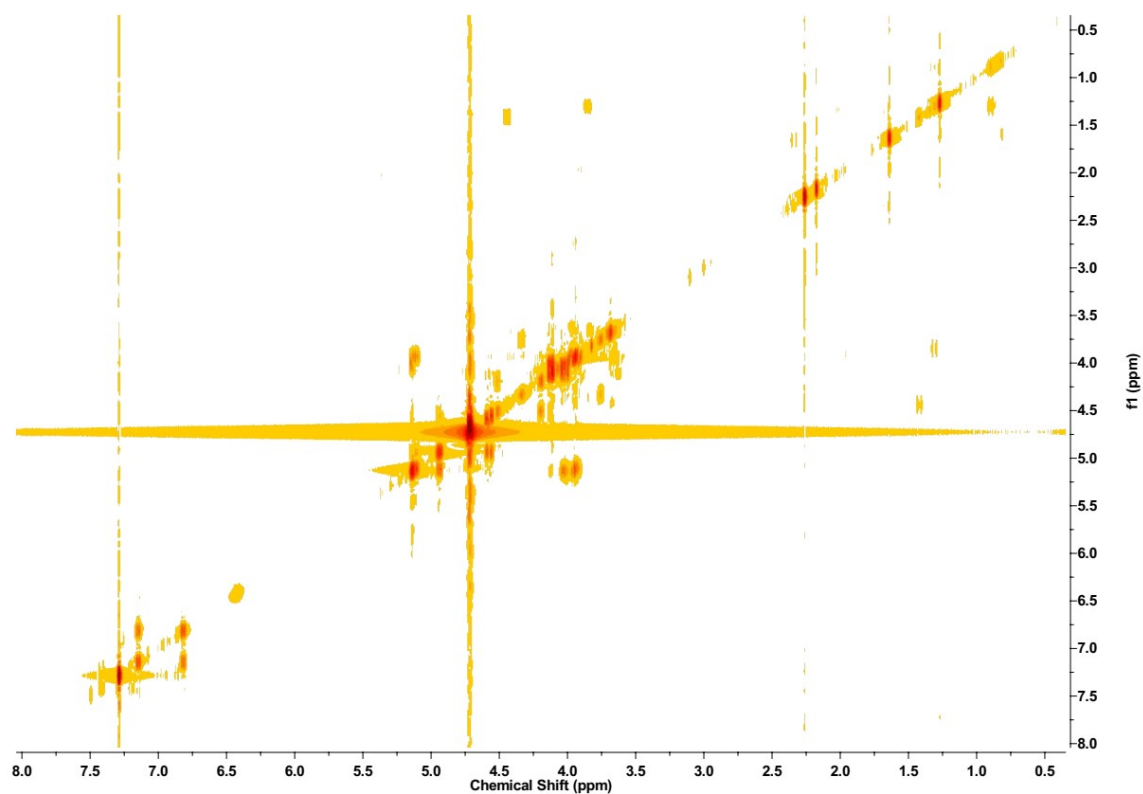

**Figure S3-1.** Full 2D  $^1\text{H}$ – $^1\text{H}$  COSY spectrum of ISB-PC ( $\text{CDCl}_3$ , 500 MHz), showing the complete spectral map used for analysis. The enlarged region of interest is provided in Figure S3-3. A weak cross-peak is observed within the overlapping EO methylene region (4.2–4.6 ppm); however, no sequence-specific correlations (including  $b_1/b_1'$ ) are assigned due to peak overlap and limited signal resolution.

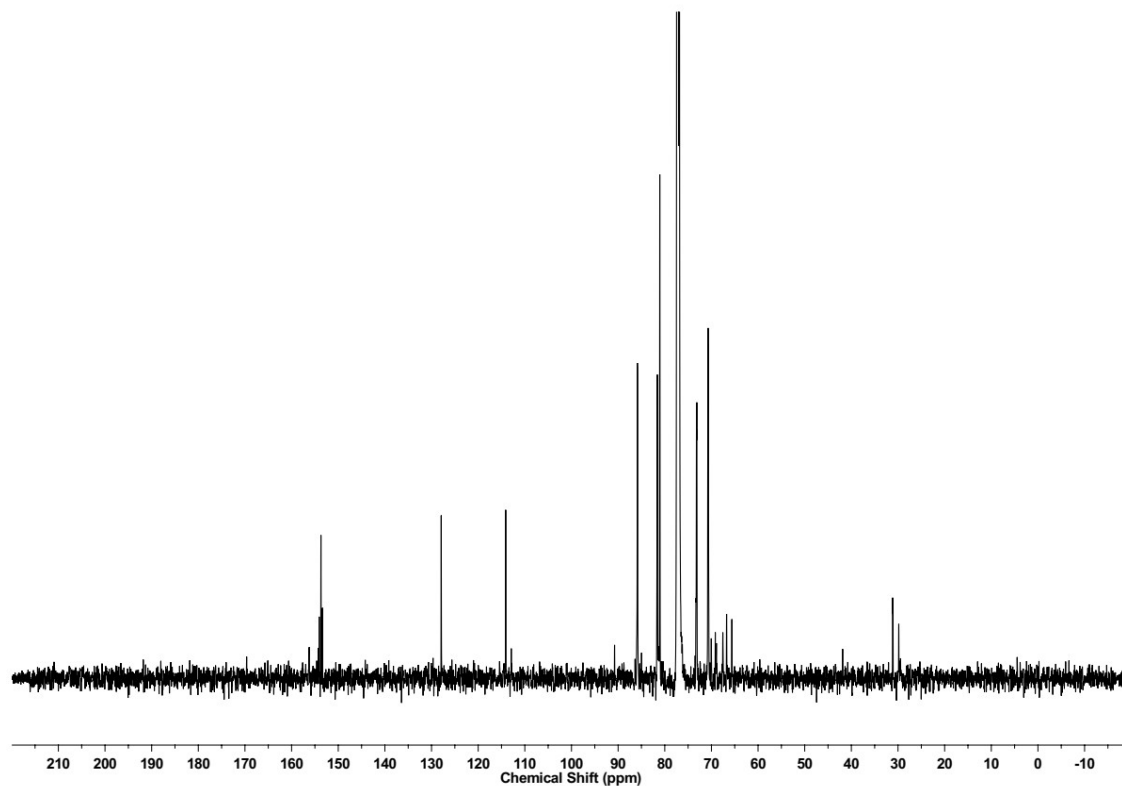

**Figure S3-2.** Full  $^{13}\text{C}$  NMR spectrum of ISB-PC in  $\text{CDCl}_3$  (100 MHz, ~35 mg/mL, re-acquired under reviewer's recommended conditions). The expanded carbonate region ( $\delta$  156–151 ppm) is presented in the main text (Figure 1D), where three distinct peaks at  $\delta$  154.08, 153.71, and 153.38 ppm are clearly resolved with markedly improved signal-to-noise ratio, confirming the carbonate sequence assignments.

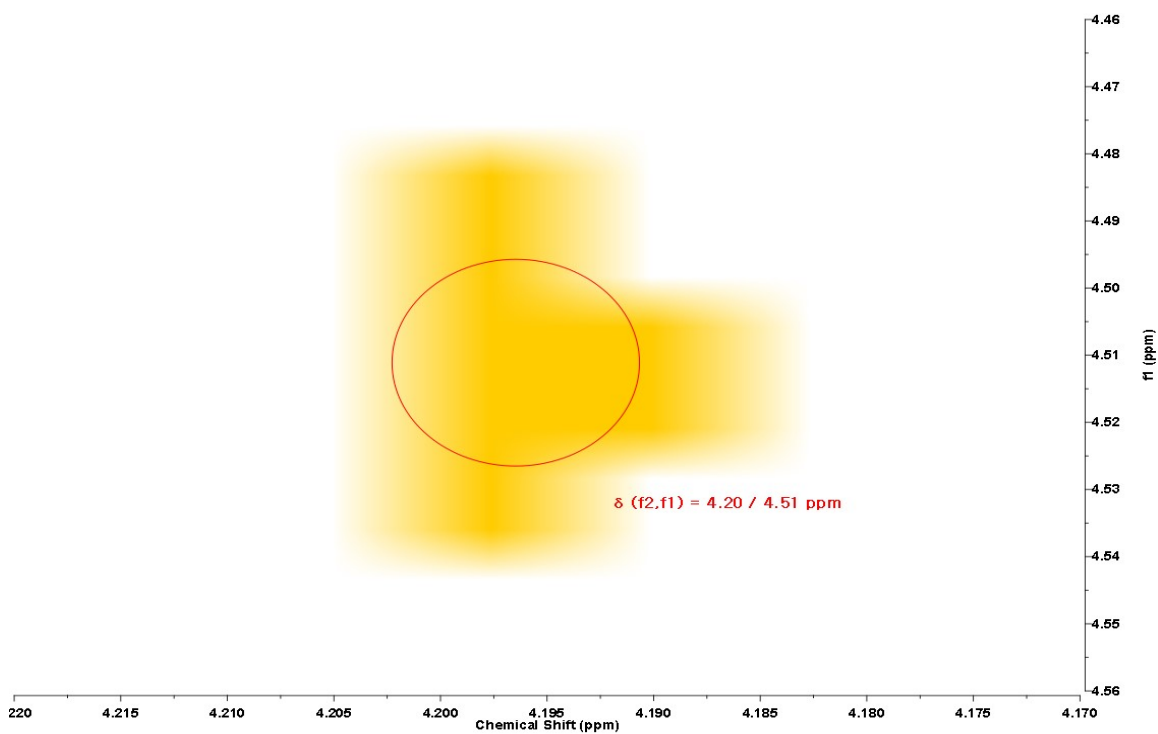

**Figure S3-3.** Enlarged 2D  $^1\text{H}$ - $^1\text{H}$  COSY spectrum highlighting the weak cross-peak within the EO methylene region (4.2–4.6 ppm). Due to spectral overlap and limited resolution, this feature is not assigned to any sequence-specific proton correlation.

**Table S1.** Excerpt from TopSpin audit trail confirming re-acquisition and processing of the  $^{13}\text{C}$  NMR spectrum at high concentration ( $\sim 35\text{ mg/mL}$  in  $\text{CDCl}_3$ ).

Note: All NMR measurements ( $^1\text{H}$ , COSY, and  $^{13}\text{C}$ ) were performed at 298 K using a Bruker AVANCE 500 MHz spectrometer. The COSY spectrum was acquired at  $35\text{ mg mL}^{-1}$  with extended acquisition time and an enlarged ROI to enhance cross-peak visibility, while the  $^{13}\text{C}$  spectrum was re-acquired at high concentration with extended acquisition time to improve signal-to-noise ratio.

| No. | Date & Time (KST)      | User  | Process     | Notes                                                                           |
|-----|------------------------|-------|-------------|---------------------------------------------------------------------------------|
| 1   | 2025-08-12 05:50:06    | nmrsu | Acquisition | $^{13}\text{C}$ NMR acquisition started (Bruker AVANCE 500 MHz, CAB AV4 BASIC). |
| 2   | 2025-08-12 06:44:05    | nmrsu | Acquisition | Acquisition completed, new dataset created (UUID: 32ccbeca...).                 |
| 3   | 2025-08-12 15:43:36    | nmrsu | Processing  | Raw data processing initiated (LB = 1, SI = 32K).                               |
| 4   | 2025-08-12 15:43:37    | nmrsu | Processing  | Peak picking (apk), baseline correction (abs), phase adjustment.                |
| 5   | 2025-08-13 08:58:30–34 | nmrsu | Processing  | Final processing: apbk, ht, apk, abs (baseline correction repeated).            |
